# Supplementary material for: A highly sensitive, foldable and wearable pressure sensor based on MXene-coated airlaid paper for electronic skin
Source: Royal Society of Chemistry journal article supplement (doi:10.1039/d1tc02458b), 2021-01-01
Supplement: d1tc02458b1.pdf [file d1tc02458b1.pdf]

## Supporting Information

### Highly sensitive, foldable and wearable pressure sensor based on MXene-coated airlaid paper for electronic skin

Di-Jie Yao,<sup>a</sup> Zhenhua Tang,<sup>ab\*</sup> Li Zhang,<sup>a</sup> Zhi-Gang Liu,<sup>a</sup> Qi-Jun Sun,<sup>a</sup> Song-Cheng Hu,<sup>a</sup> Qiu-Xiang Liu,<sup>a</sup> Xin-Gui Tang<sup>a</sup> and Jianyong Ouyang<sup>c\*</sup>

<sup>a</sup>School of Physics and Optoelectric Engineering, Guangdong University of Technology, Guangzhou Higher Education Mega Center, Guangzhou, 510006, China

<sup>b</sup>Guangdong Provincial Key Laboratory of Electronic Functional Materials and Devices, Huizhou University, Huizhou 516001, Guangdong, China.

<sup>c</sup>Department of Materials Science & Engineering, National University of Singapore, Singapore 117576.

\*: *Correspondence authors*

E-mail addresses: [tangzh@gdut.edu.cn](mailto:tangzh@gdut.edu.cn) (Zhenhua Tang); [mseoj@nus.edu.sg](mailto:mseoj@nus.edu.sg) (Jianyong Ouyang)

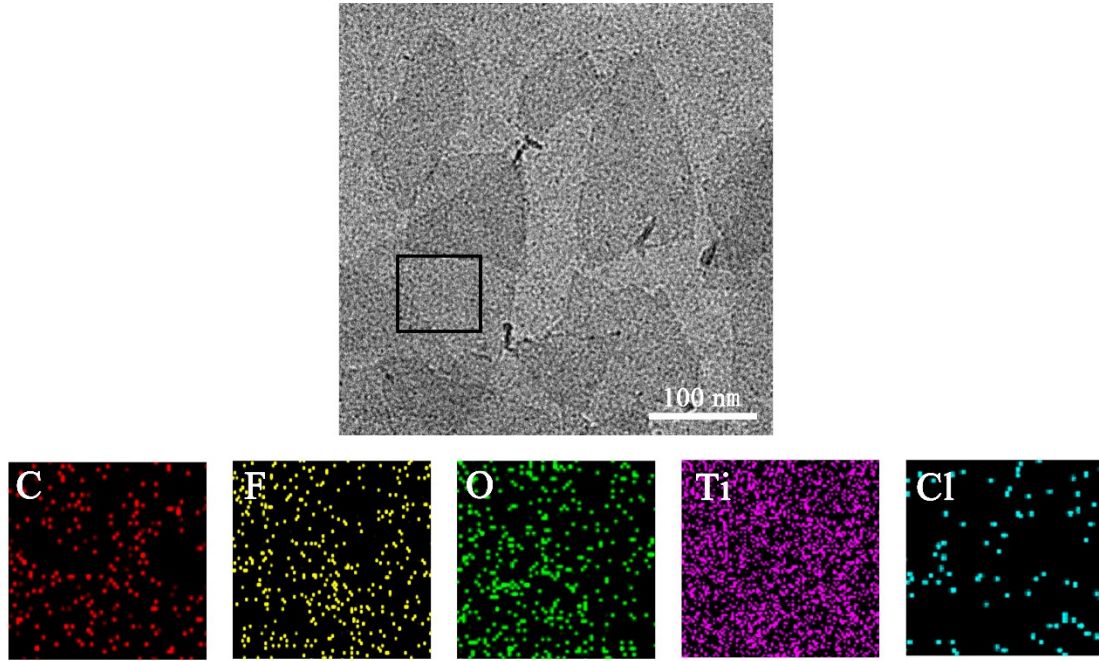

**Fig. S1** TEM image along with the EDS elemental mapping of C, F, O, Ti and Cl in selection frame for MXene nanosheets.

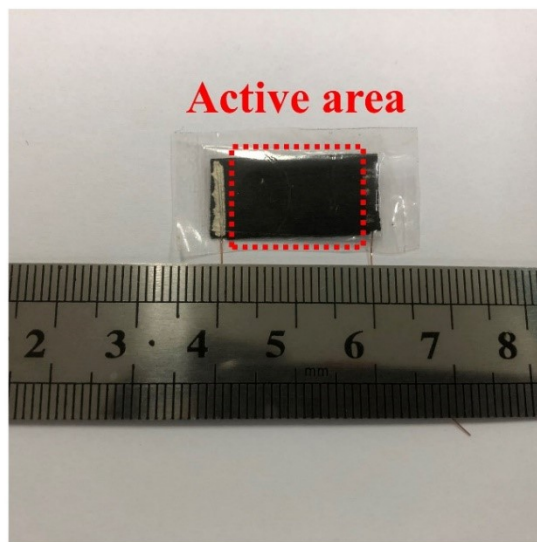

**Fig. S2** Digital photograph of the MXene AP pressure sensor encapsulated in the surgical semipermeable polyurethane film.

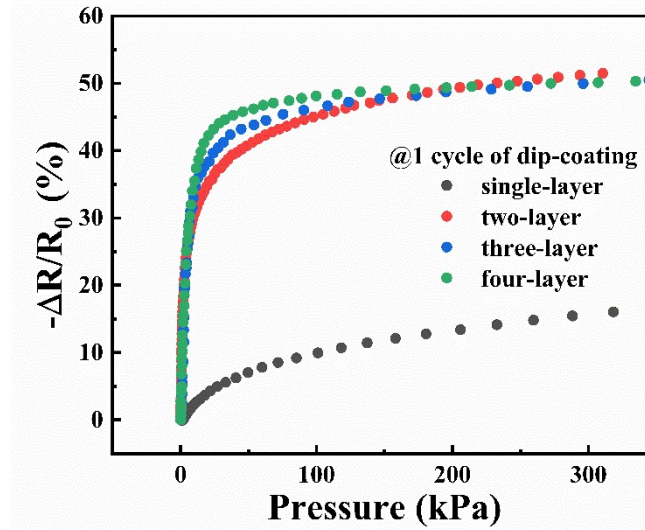

**Fig. S3** Relative change in resistance of the single-, two-, three- and four-layer MXene AP sensors under different pressures.

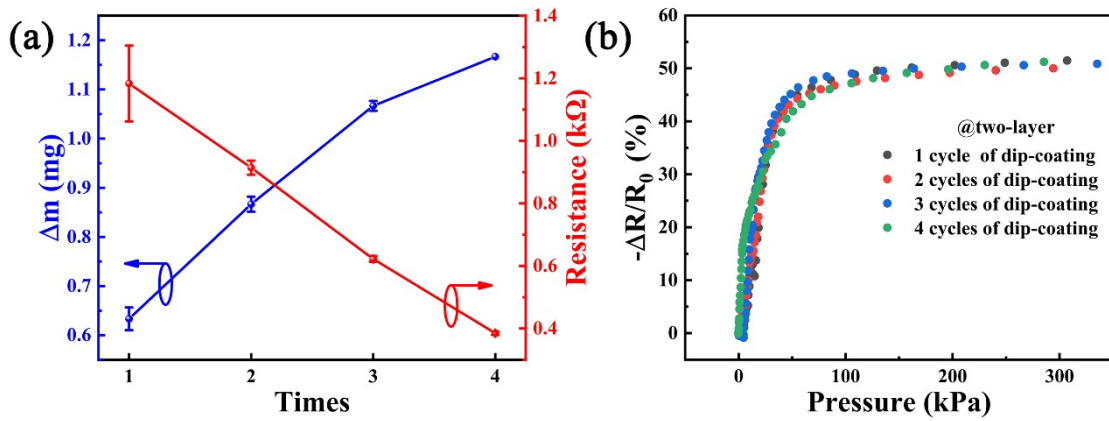

**Fig. S4** (a) Variation in mass loading and electrical resistances with 1, 2, 3 and 4 cycles of dip-coating. (b) Relative change in resistance of MXene AP two-layer sensors with different cycles of dip-coatings under different pressures.

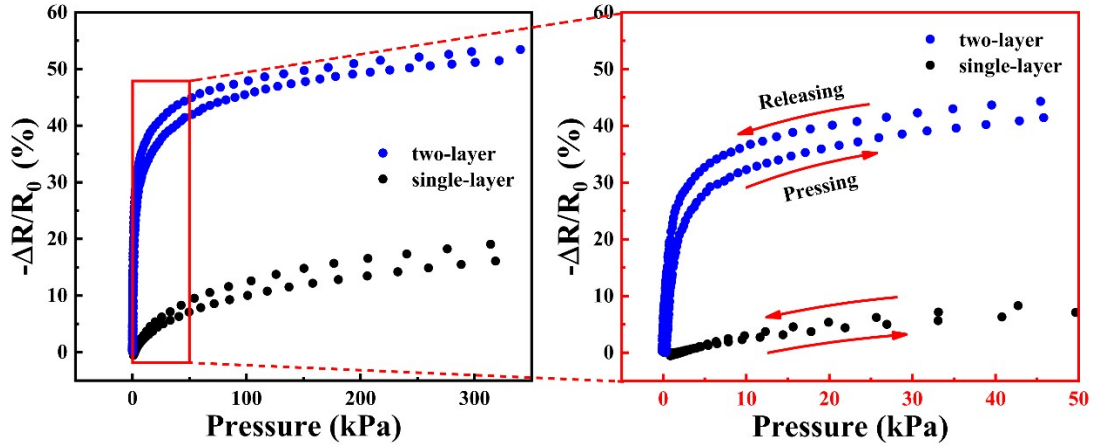

**Fig. S5** Relative resistance change of the pressure sensor based on single-layer and two-layer MXene AP fabrics during a continuous pressing and releasing cycle of pressure.

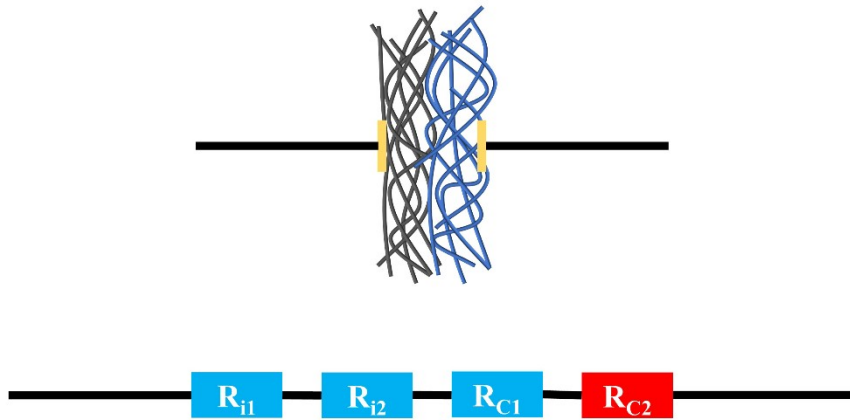

**Fig. S6** The equivalent circuit model of the MXene AP pressure sensor. Total resistance of the sensor consists of  $R_{i1}$  (the intrinsic resistance of the copper wire electrodes),  $R_{i2}$  (the intrinsic resistance of the MXene AP fibers),  $R_{C1}$  (the contact resistance between copper electrodes and MXene AP fabric) and  $R_{C2}$  (the contact resistance of MXene AP fibers including the single-layer MXene AP structure and between the layers of the MXene AP fabric).

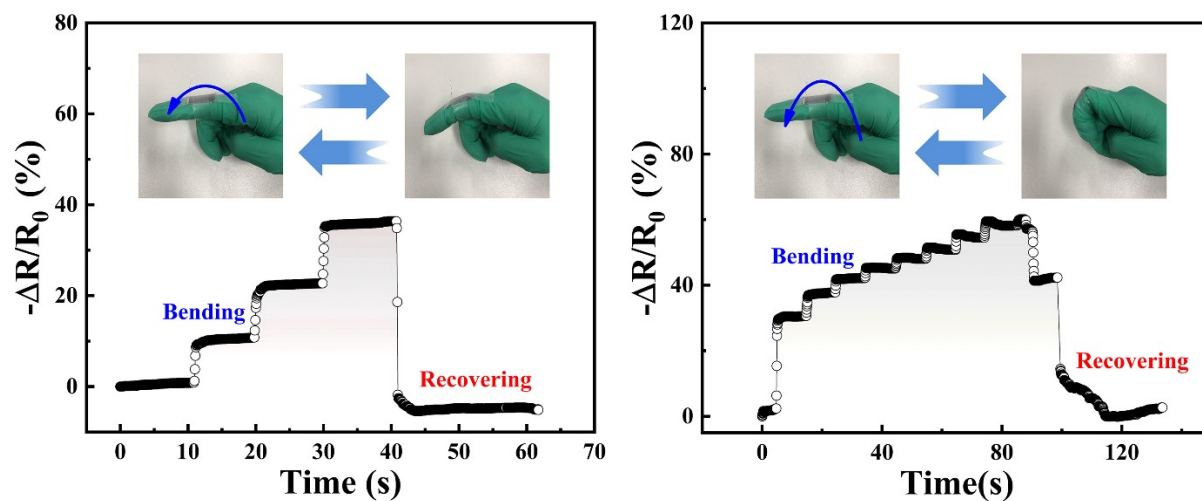

Fig. S7 Resistance sensing signals induced by different degrees of the index finger bending.

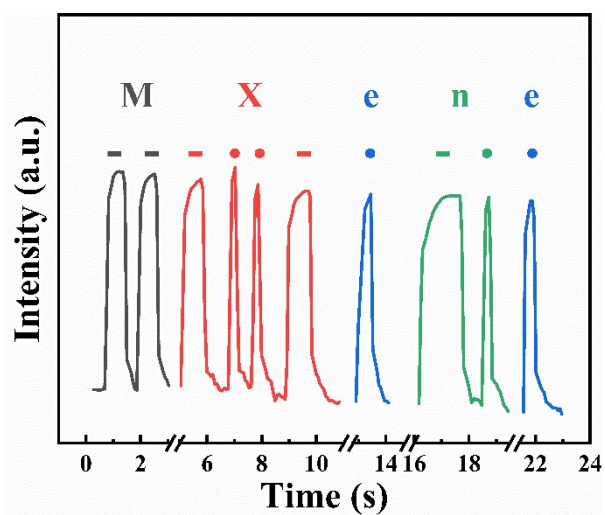

Fig. S8 Morse code for “MXene” produced by touching the sensor.

**Table S1** Comparison of piezoresistive pressure sensors based on various materials.

| Materials                                       | Sensitivity (kPa <sup>-1</sup> )                                                                | Sensing range (kPa) | Reference |
|-------------------------------------------------|-------------------------------------------------------------------------------------------------|---------------------|-----------|
| MXene/cotton fabric                             | 5.30 (0-1.30 kPa),<br>2.27 (1.30-10.25 kPa),<br>0.57 (10.25-40.73 kPa),<br>0.08 (40.73-160 kPa) | 160                 | [37]      |
| AgNWs/tissue                                    | 1.5 (0.03-30.247 kPa)                                                                           | 30.247              | [50]      |
| rGO-coated flexible wood                        | 1.85 (0-60 kPa),<br>0.7(60~120 kPa)                                                             | ~120                | [51]      |
| Janus graphene film                             | 0.736 (0-1 kPa)<br>0.005 (1-100 kPa)                                                            | 100                 | [52]      |
| graphene-textile                                | 0.23 (0-140 kPa)                                                                                | 140                 | [53]      |
| 3D honeycomb-like graphene network              | 3.54 (0-8 kPa)<br>1.88 (8-50 kPa)<br>0.32 (50-150 kPa)                                          | 150                 | [54]      |
| graphene-paper                                  | 17.2 (0-2 kPa)<br>0.012 (2-20 kPa)                                                              | 20                  | [55]      |
| melamine foam/<br>conductive graphite<br>flakes | 7.58 (0-5 kPa)<br>8.6 (5-28.9 kPa)                                                              | 28.9                | [56]      |

|                             |                                                                                        |       |           |
|-----------------------------|----------------------------------------------------------------------------------------|-------|-----------|
| MXene/chitosan/PU<br>sponge | 0.014 (0-6.5 kPa),<br>-0.015 (6.5-85.1 kPa),<br>-0.001 (85.1-245.7kPa)                 | 245.7 | [57]      |
| MXene@AP                    | 7.65 (0-3.3 kPa)<br>0.98 (3.3-12.2 kPa)<br>0.24 (12.2-48.8 kPa)<br>0.04 (48.8-300 kPa) | 300   | This work |
